# Supplementary material for: Reductive cleavage of N-substituted aromatic amides as tert-butyl acylcarbamatesElectronic supplementary information (ESI) available: reductive cleavage of N-substituted aromatic amides as tert-butyl acylcarbamates. See http://www.rsc.org/suppdata/p1/b1/b107330n/
Source: Royal Society of Chemistry journal article supplement (doi:10.1039/b107330n), 2001-12-05
Supplement: b107330n.doc [file b107330n.doc]

#### Supplementary data

# Reductive cleavage of *N*-substituted aromatic amides as *tert*-butyl acylcarbamates

**Ulf Ragnarsson,**a*Leif Grehn,*a* Hernani L.S. Maia*b* and Luis S. Monteiro*b***

*aDepartment of Biochemistry, University of Uppsala, Biomedical Center, PO Box 576, SE-751 23 Uppsala, Sweden. E-mail:* [*urbki@bmc.uu.se*](mailto:urbki@bmc.uu.se)*; Fax: +46 18 55 21 39*

*bDepartamento de Quimica, Universidade do Minho, Gualtar, P-4700-320 Braga, Portugal*

___________________________________________________________________________

## Expanded experimental

### *N*-Benzyl-1-naphthamide (1a). From commercial 1-naphthoyl chloride; yield: 73%; mp 125-126 C (from EtOH; lit.,18 118-119 C); max/cm-1 3273 (NH), 1641/1634 (CO); H (400 MHz, CDCl3): 4.66 (d, *J* 5.8, 2H), 6.42 (pert(urbed) t, 1H), 7.24-7.39 (compl(ex) sign(al), 6H), 7.47-7.65 (compl. sign., 3H), 7.80-7.87 (compl. sign., 2H), 8.29-8.33 (pert. sign., 1H). C (100.4 MHz, CDCl3): 44.01, 124.61, 124. 89, 126.38, 127.08, 127.56, 127.82, 128.25, 128.75, 130.12, 130.61, 133.62, 134.21, 138.08, 169.36.

***N*-Benzyl-*N*-Boc-1-naphthamide (2a).** Synthesis performed in CH2Cl2, slow reaction; yield: 77%; mp 85.5-86.5 C (from light petroleum); intensive blue fluorescence at 350 nm; max/cm-1 1726, 1667, 1651 (CO); H (400 MHz, CDCl3): 0.75 (s, 9H), 5.15 (s, 2H), 7.29-7.49 (compl. sign., 7H), 7.55 (pert. d, *J*7, 2H), 7.81-7.92 (symmetrical cluster, 3H). C (100.4 MHz, CDCl3): 26.94, 48.15, 83.14, 123.83, 124.67, 124.90, 126.25, 127.02, 127.52, 128.24, 128.51, 128.55, 129.83, 129.99, 133.34, 136.49, 137.71, 152.94, 172.11. (Found: C, 76.5; H, 6.7; N, 4.0. C23H23NO3 requires: C, 76.43; H, 6.41; N, 3.88%).

***N*-Benzyl-2-naphthamide (1b).** From commercial 2-naphthoyl chloride; yield: 66%; mp 138.5-140 C (from EtOH; lit.,19 140-143 C); max/cm-1 3287 (NH), 1637/1623 (CO); H (400 MHz, CDCl3): 4.70 (d, *J* 5.5, 2H), 6.63 (br. sign., 1H), 7.28-7.41 (compl. sign., 6H), 7.54 (dp, *J*8, J2, 2H), 7.83-7.90 (compl. sign., 3H), 8.30 (s, 1H). C (100.4 MHz, CDCl3): 44.25, 123.59, 126.74, 127.45, 127.64, 127.73, 127.97, 128.47, 128.80, 128.90, 131.58, 132.61, 134.75, 138.22, 167.42.

***N*-Benzyl-*N*-Boc-2-naphthamide (2b).** Synthesis performed in CH2Cl2, slow reaction; yield: 78%; mp 91-92 C (from Et2O/light petroleum); max/cm-1 1733, 1666 (CO); H (400 MHz, CDCl3): 1.05 (s, 9H), 5.05 (s, 2H), 7.27 (pert. t, *J*7, 1H), 7.35 (pert. t, *J*7, 2H), 7.47 (pert. d, *J*7, 2H), 7.52 (pert. m, 2H), 7.60 (dd, *J*1 8.4, *J*2 1.8, 1H), 7.83-7.87 (compl. sign., 3H), 8.03 (d, *J* 1.4, 1H). C (100.4 MHz, CDCl3): 27.32, 49.02, 83.18, 124.39, 126.70, 127.41, 127.56, 127.76, 127.91, 128.17, 128.46, 128.76, 132.37, 134.46, 134.80, 137.88, 153.54, 173.09. (Found: C, 76.5; H, 6.3; N, 4.0. C23H23NO3 requires: C, 76.43; H, 6.41; N, 3.88%).

***N*-Benzyl-2-pyridinecarboxamide (1c).** From commercial ethyl ester; yield: 86%; mp 85.5-86.5 C (from EtOAc/light petroleum; lit.,20 87-87.5 C); max/cm-1 3303 (NH), 1660 (CO); H (400 MHz, CDCl3): 4.67 (d, *J* 6.1, 2H), 7.25-7.38 (compl. sign., 5H), 7.41 (dd, further split, *J*18, *J*25, *J*3,41.5, 1H), 7.85 (pert. dt, *J*1 8, *J*21.8, 1H), 8.24 (pert. d, *J*8, 1H), 8.40 (br. sign., 1H), 8.52 (dm, *J*15, *J*21, 1H). C (100.4 MHz, CDCl3): 43.45, 122.34, 126.16, 127.42, 127.80, 128.65, 137.37, 138.18, 147.99, 149.76, 164.15.

***N*-Benzyl-*N*-Boc-2-pyridinecarboxamide (2c).** Synthesis performed in MeCN, slow reaction, completed at 40 C; yield: 75%; mp 81.5-82.5 C (from EtOAc/light petroleum); max/cm-1 1735, 1669 (CO); H (400 MHz, CDCl3): 1.13 (s, 9H), 5.03 (s, 2H), 7.25 (pert. t, *J*7.3, 1H), 7.33 (pert. t, *J*8, 2H), 7.37 (ddd, *J*17.6, *J*24.9, *J*31.3, 1H), 7.45 (pert. d, *J*8, 2H), 7.68 (dt, *J*1 7.7, *J*2 1.1, 1H), 7.78 (dt, *J*1 7.7, *J*2 1.7, 1H), 8.57 (ddd, *J*1 4.8 Hz, *J*2 1.7, *J*3 1.1, 1H). C (100.4 MHz, CDCl3): 27.24, 48.67, 122.78, 125.18, 127.26, 127.84, 128.35, 136.74, 137.47, 148.13, 153.08, 154.48, 171.37. (Found: C, 69.4; H, 6.6; N, 9.1. C18H20N2O3 requires: C, 69.21; H, 6.45; N, 8.97%).

***N*-Benzyl-3-pyridinecarboxamide (1d).** From commercial nicotinoyl chloride hydrochloride in pyridine; yield: 38% after recryst. twice; mp 75-77 C (from EtOAc/light petroleum; lit.,20 72-73 C); max/cm-1 3284 (NH), 1634 (CO); H (400 MHz, CDCl3): 4.61 (d, *J* 5.8, 2H), 7.12 (br. sign., 1H), 7.25 (compl. sign., 6H), 8.12 (dt, *J*1 8.0, *J*21.5, 1H), 8.62 (d, *J*4 Hz, 1H), 8.93 (s, 1H). C (100.4 MHz, CDCl3): 44.09, 123.48, 127.66, 127.88, 128.75, 130.13, 135. 32, 137.78, 147.81, 151.97, 165.46.

***N*-Benzyl-*N*-Boc-3-pyridinecarboxamide (2d).** Synthesis performed in MeCN; yield: 77%; mp 71-72 C (from EtOAc/light petroleum); max/cm-1 1720, 1676 (CO); H (400 MHz, CDCl3): 1.18(s, 9H), 5.01 (s, 2H), 7.25-7.42 (compl. sign., 6H), 7.84 (dt, *J*1 7.7, *J*21.7, 1H), 8.68 (d, *J*4, 1H), 8.72 (br. s, 1H). C (100.4 MHz, CDCl3): 27.37, 48.72, 83.88, 123.01, 127.49, 127.98, 128.45, 133.50, 134.86, 137.38, 148.01, 151.25, 152.85, 170.70. (Found: C, 69.2; H, 6.5; N, 9.1. C18H20N2O3 requires: C, 69.21; H, 6.45; N, 8.97%).

***N*-Benzyl-4-pyridinecarboxamide (1e).** From commercial isonicotinoyl chloride hydrochloride in pyridine; yield: 70%; mp 91-92 C (from EtOAc/light petroleum; lit.,20 84.5-85 C); max/cm-1 3339 (NH), 1641 (CO); H (400 MHz, CDCl3): 4.56 (d, *J* 5.8, 2H), 7.25-7.32 (compl. sign., 5H), 7.51 (br. t, 1H), 7.59 (d, *J*5 Hz, 2H), 8.57 (br. d, *J*5, 2H). C (100.4 MHz, CDCl3): 44.03, 121.02, 127.63, 127.70, 128.69, 137.53, 141.50, 150.19, 150.47, 165.50.

***N*-Benzyl-*N*-Boc-4-pyridinecarboxamide (2e).** Synthesis performed in MeCN; yield: 84%; mp 75.5-76.5 C (from EtOAc/light petroleum); max/cm-1 1739, 1664 (CO); H (400 MHz, CDCl3): 1.16 (S, 9H), 4.99 (s, 2H) 7.27-7.42 (compl. sign., 7H), 8.69 (d, *J*5, 2H). C (100.4 MHz, CDCl3): 27.34, 48.69, 84.35, 120.76, 127.65, 128.13, 128.53, 137.21, 145.32, 149.84, 152.55, 170.86. (Found: C, 69.4; H, 6.5; N, 9.0. C18H20N2O3 requires: C, 69.21; H, 6.45; N, 8.97%).

***N*-Benzylpyrazinecarboxamide (1f).** Via ethyl ester; yield: 82%; mp 113-114.5 C (from EtOAc; lit.,20 116 C); max/cm-1 3369 (NH), 1670 (CO); H (400 MHz, CDCl3): 4.68 (d, *J* 6.0, 2H), 7.27-7.38 (compl. sign., 5H), 8.16 (br. sign., 1H), 8.50 (dd, *J*1 2.4, *J*2 1.5, 1H), 8.74 (d, *J* 2.4, 1H), 9.45 (d, *J* 1.5, 1H). C (100.4 MHz, CDCl3): 43.45, 127.63, 127.82, 128.74, 137.69, 142.50, 144.45, 147.23, 162.83.

***N*-Benzyl-*N*-Boc-pyrazinecarboxamide (2f).** See typical procedure; yield: 91%; mp 73-74 C (from EtOAc/light petroleum); max/cm-1 1742, 1674 (CO); H (400 MHz, CDCl3): 1.17 (s, 9H), 5.03 (s, 2H), 7.26-7.36 and 7.42-7.45 (compl. sign., 3H+2H), 8.54 (dd, *J*1 2.5, *J*2 1.5, 1H), 8.66 (d, *J* 2.5 1H), 8.90 (d, *J* 1.5, 1H). C (100.4 MHz, CDCl3): 27.37, 48.55, 83.84, 127.52, 127.90, 128.49, 137.07, 142.74, 143.89, 145.65, 150.17, 153.61, 169.50. (Found: C, 65.1; H, 5.9; N, 13.4. C17H19N3O3 requires: C, 65.16; H, 6.11; N, 13.41%).

***N*-Benzyl-2-quinolinecarboxamide (1g).** Via 2-quinolinoyl chloride; yield: 69%; mp 120-121 C (from toluene; lit.,21 116 C); max/cm-1 3329 (NH), 1658 (CO); H (400 MHz, CDCl3): 4.74 (d, *J* 5.7, 2H), 7.29 (pert. t, *J*7.5, 1H), 7.36 (pert. t, *J*7.5, 2H), 7.40-7.43 (compl. sign., 2H), 7.60 (pert. dt, *J*1 7.6, *J*2 1.2, 1H), 7.73 (pert. dt, *J*1 7.7, *J*2 1.5, 1H), 7.87 (pert. dd, *J*1 8.3, *J*21, 1H), 8.08 (pert. dd, *J*1 8.5, *J*20.6, 1H), 8.32 (t, *J* 8.5, 1H), 8.34 (t, *J* 8.5, 2H), 8.66 (pert. t, 1H). C (100.4 MHz, CDCl3): 43.57, 118.96, 127.45, 127.70, 127.86, 127.91, 128.68, 129.30, 129.53, 130.13, 137.60, 138.27, 146.30, 149.58, 164.30.

***N*-Benzyl-*N*-Boc-2-quinolinecarboxamide (2g).** Synthesized in MeCN at 50 C; yield: 80%; mp 99-100 C (from EtOAc/light petroleum); max/cm-1 1737, 1670 (CO); H (400 MHz, CDCl3): 1.00 (s, 9H), 5.10 (s, 2H), 7.27 (pert. t, *J*7.6, 1H), 7.35 (pert. t, *J*7.4, 2H), 7.50-7.53 (compl. sign., 2H), 7.60 (pert. dt, *J*1 7.5, *J*2 1.2, 1H), 7.748 (overlapping d, *J* 8.5, 2H), 7.754 (overlapping pert. dt, *J*1 7.7, *J*2 1.5, 1H), 7.85 (pert. dd, *J*1 8.2, *J*2 0.7, 1H), 8.10 (d, *J* 8.5, 1H), 8.25 (d, *J* 8.5, 1H). C (100.4 MHz, CDCl3): 27.22, 48.67, 83.11, 119.68, 127.34, 127.68, 127.73, 127.97, 128.40, 128.49, 129.63, 130.22, 137.06, 137.49, 146.28, 153.13, 154.05, 171.49. (Found: C, 73.1; H, 6.1; N, 7.8. C22H22N2O3 requires: C, 72.91; H, 6.12; N, 7.73%).

***N*-Benzyl-2-quinoxalinecarboxamide (1h).** From commercial 2-quinoxaloyl chloride; yield: 69%; mp 147-149 C (from MeOH/H2O; lit.,22 155-156 C); max/cm-1 3296 (NH), 1658 (CO); H (400 MHz, CDCl3): 4.75 (d, *J* 6.0, 2H), 7.31 (pert. t, 1H), 7.37 (pert. t, 2H), 7.41 (pert. d, 2H), 7.83 (symm. m, 2H), 8.05-8.08 and 8.16-8.19 (compl. sign., 1H+1H), 8.34 (br. t, 1H), 9.71 (s, 1H). C (100.4 MHz, CDCl3): 43.54, 127.65, 127.89, 128.76, 129.47, 129.54, 130.76, 131.53, 137.80, 140.18, 143.31, 143.91, 163.16.

***N*-Benzyl-*N*-Boc-2-quinoxalinecarboxamide (2h).** Synthesis performed in MeCN; yield: 84%; mp 45-47 C (from Et2O/light petroleum; large colourless crystals); max/cm-1 1737, 1666 (CO); H (400 MHz, CDCl3): 1.04 (s, 9H), 5.10 (s, 2H), 7.30 (pert. t, 1H), 7.37 (pert. t, 2H), 7.50 (pert.d, 2H), 7.84 (symm. m, 2H), 8.07-8.11 and 8.14-8.18 (compl. sign., 1H+1H), 9.11 (s, 1H) (20 mol% of Et2O visible!). C (100.4 MHz, CDCl3): 27.30, 48.58, 83.86, 127.60, 128.07, 128.54, 129.43, 129.66, 130.84, 131.17, 137.09, 140.52, 142.67, 143.61, 149.01, 152.69. (Found: C, 69.1; H, 6.3; N, 10.9 after drying of powdered sample at 0.01 mm Hg for 10 days at 35 C. C21H21N3O3x1/4Et2O requires: C, 69.18; H, 6.20; N, 11.00%).

### *N*-Phenyl-1-naphthamide (1i). From 1-naphthoyl chloride; yield: 87%; mp 162.5-163.5 C (from EtOH; lit.,23 162-163 C); max/cm-1 3287 (NH), 1650 (CO); H (400 MHz, CDCl3): 7.15 (t, *J*8, 1H), 7.34 (t, *J*8, 2H), 7.39 (dd, *J*1 8.0, *J*2 7.3, 1H), 7.48-7.52 (compl. sign., 2H), 7.61-7.65 (overlapping sign., 3H), 7.83-7.90 (overlapping sign., 3H), 8.29 (pert. dd, 1H). C (100.4 MHz, CDCl3): 119.99, 124.62, 124.67, 125.06, 125.23, 126.53, 127.29, 128.38, 129.08, 130.02, 130.96, 133.69, 134.40, 138.03, 167.58.

***N*-Boc-*N*-phenyl-1-naphthamide (2i).** Synthesis performed in CH2Cl2; yield: 94%; mp 119-120 C (from Et2O/light petroleum); max/cm-1 1735, 1673 (CO); H (400 MHz, CDCl3): 0.87 (s, 9H), 7.36-7.41 (compl. sign., 3H), 7.46-7.60 (overlapping sign., 5H), 7.69 (dd, *J*17, *J*21, 1H), 7.88 (pert. d, *J*7.7, 1H), 7.94 (br. d, *J*8, 1H), 8.23 (br. d, *J*8, 1H). C (100.4 MHz, CDCl3): 27.04, 83.58, 124.65, 124.75, 126.42, 127.30, 128.05, 128.37, 129.28, 130.22, 130.54, 133.45, 135.75, 138.55, 152.83, 172.01. (Found: C, 76.2; H, 6.3; N, 4.1. C22H21NO3 requires: C, 76.06; H, 6.09; N, 4.03%).

**4-Nitrophenyl pyrazine-2-carboxylate (3).** Commercial pyrazine carboxylic acid (1.24 g, 10.0 mmol) was almost completely dissolved by gentle heating in dry pyridine (15 cm3). Recrystallized di(4-nitrophenyl) sulfite (3.57 g, 11.0 mmol; mp 105.5-107 C, lit.,12 104-106 C) was then added in small portions with rapid stirring over a period of 5 min. under argon. The resulting yellowish suspension was stirred overnight at ambient temperature with exclusion of atmospheric moisture, whereupon the solvent was stripped off at reduced pressure and the semisolid residue was partitioned between EtOAc (500 cm3) and 0.2 mol dm-3 citric acid (200 cm3). The organic layer was washed in turn with 0.2 mol dm-3 citric acid (3100 cm3), 1 mol dm-3 NaHCO3 (5100 cm3, last portion still pale yellow) and brine (3100 cm3) and dried (Na2SO4). Removal of the solvent left an almost colourless moist solid residue (3.2 g) which was recrystallized from isopropanol containing 1% HOAc (80 cm3/g). The yield of microcrystalline **3** was 1.79 g (73%); mp 183-184 C (dec.) (lit.,11 185-187 C); pure by TLC (toluene/MeCN 2:1); H (400 MHz, CDCl3): 7.50 (d, *J* 9.0, 2H), 8.37 (d, *J* 9.0, 2H), 8.85 (dd, *J*1 2.4, *J*2 1.4, 1H), 8.91 (d, *J* 2.4, 1H), 9.49 (d, *J* 1.4, 1H); C (100.4 MHz, CDCl3): essentially identical with published data.11

***N****-***Phenyl-2-pyrazinecarboxamide (4a).** To a solution of aniline (280 mg, 3.00 mmol) and pyridine (240 mg, 3.00 mmol) in dry DMF (4 cm3) was added solid **3** (491 mg, 2.00 mmol) in small portions with rapid stirring over a few min. at ambient temperature. The resulting suspension was heated gently with swirling until all had dissolved and left overnight with exclusion of atmospheric moisture. A small aliquot (2 drops) was worked up as described below to confirm by TLC that the reaction was completed, whereafter most of the solvent was stripped off at reduced pressure. The semisolid residue was dissolved in CH2Cl2 (25 cm3) and partitioned between EtOAc (100 cm3) and 0.2 mol dm-3 citric acid (50 cm3). The organic extract was washed with 0.2 mol dm-3 citric acid (225 cm3), 1 mol dm-3 Na2CO3 (725 cm3, last portion colourless) and brine (325 cm3) and dried (Na2SO4). Removal of the solvent left a light brown solid (386 mg, 97%), essentially pure by TLC (toluene/MeCN 2:1). Recrystallisation from EtOAc/hexane 1:2 (30 cm3/g, decolourizing carbon) furnished heavy white crystals; mp 126.5-127 C (lit.,24 127-128 C); H (400 MHz, CDCl3): 7.18 (pert. t, *J*7.5, 1H), 7.40 (pert. t, *J*8, 2H), 7.76 (pert. d, *J*8, 2H), 8.59 (dd, *J*1 2.4, *J*2 1.4, 1H), 8.80 (d, *J* 2.4, 1H), 9.52 (d, *J* 1.4, 1H), 9.67 (br. s, 1H). C (100.4 MHz, CDCl3): 119.79, 124.80, 129.15, 137.20, 142.33, 144.38, 144.64, 147.48, 160.60.

***N*-Boc-*N****-***Phenyl-2-pyrazinecarboxamide (5a).** Dry **4a** (199 mg, 1.00 mmol) and Boc2O (240 mg, 1.10 mmol) in CH2Cl2 (4 cm3) was treated with DMAP (6 mg, 0.05 mmol) with gentle mixing. After a few min. all had dissolved, whereafter the light brown reaction mixture was kept at RT with exclusion of moisture. The reaction was monitored by TLC (toluene/MeCN 2:1) and after 15 h all starting material had been consumed. The solvent was stripped off at reduced pressure and the remaining solid was partitioned between Et2O (80 cm3) and 0.2 mol dm-3 citric acid (40 cm3). The extract was washed in turn with 0.2 mol dm-3 citric acid, 1 mol dm-3 NaHCO3 and brine (320 cm3 each) and dried (MgSO4 in the presence of decolourizing carbon). Evaporation left chromatographically pure **5a** (296 mg, 99%); tiny white needles with mp 112.5-113 C (from Et2O, 20 cm3/g, cooling); H (400 MHz, CDCl3): 1.24 (s, 9H), 7.31 (pert. d, *J*7, 2H), 7.39 (pert. t, *J*7, 1H), 7.47 (pert. t, *J*7, 2H), 8.60 (dd, *J*1 2.5, *J*2 1.5, 1H), 8.71 (d, *J* 2.5, 1H), 9.01 (d, *J* 1.4, 1H). C (100.4 MHz, CDCl3): 27.42, 84.01, 128.01, 128.30, 129.26, 137.92, 142.79, 144.36, 146.10, 149.57, 158.58, 169,43. (Found: C, 64.2; H, 5.7; N, 13.9. C16H17N3O3 requires: C, 64.20; H, 5.72; N, 14.04).

***N****-***Methoxycarbonylmethyl-2-pyrazinecarboxamide (4b).** A suspension of methyl glycinate hydrochloride (452 mg, 3.60 mmol) and triethylamine (727 mg, 7.2 mmol) in dry MeCN (15 cm3) was treated with solid **3** with stirring at room temperature. After a few min. all had dissolved to a bright yellow solution which was left in a stoppered flask overnight. TLC (system above) confirmed complete reaction and the reaction mixture was worked up essentially as described above. The yield of crude product, pure by TLC, was 496 mg (86%). The analytical specimen was obtained by recrystallisation from EtOAc/hexane 1:2 (70 cm3/g, decolourizing carbon) as white shiny crystals; mp 97.5-98 C (lit.,25 99-100 C); H (400 MHz, CDCl3): 3.81 (s, 3H), 4.30 (d, *J* 5.7, 2H), 8.28 (br. sign., 1H), 8.57 (pert. dd, 1H), 8.78 (d, *J* 2.4, 1H), 9.40 (d, *J* 1.4, 1H). C (100.4 MHz, CDCl3): 41.13, 52.47, 142.71, 143.90, 144.37, 147.52, 163.22, 169.82.

***N*-Boc-*N****-***methoxycarbonylmethyl-2-pyrazinecarboxamide (5b).** This compound was prepared from **4b** essentially as described for **5a** but the reaction required an additional 0.55 equiv. of Boc2O and a further 15 h to go to completion. An analogous workup afforded the crude, chromatographically pure product as a colourless oil which slowly solidified on cooling. The yield in a 0.5 mmol run was 99 %; small soft needles with mp 37-37.5 C (from Et2O/pentane 1:7, 60 cm3/g, seeding and cooling); H (400 MHz, CDCl3): 1.22 (s, 9H), 3.81 (s, 3H), 4.60 (s, 2H), 8.58 (dd, *J*1 2.5, *J*2 1.5, 1H), 8.69 (d, *J* 2.5, 1H), 8.91 (d, *J* 1.5, 1H). C (100.4 MHz, CDCl3): 27.35, 45.90, 52.44, 84.44, 142.90, 143.84, 145.80, 149.79, 151.67, 168.77, 169.18. (Found: C, 53.3; H, 5.8; N, 14.0. C13H17N3O5 requires: C, 52.88; H, 5.80; N, 14.23).

***N*-Boc-benzamide (6a):** The sample used for CV originated from our earlier work.26

**Di-*tert*-butyl *N*-benzoylimidodicarbonate (6b).** The sample used for CV was prepared according to Davidsen *et al.*15b It slowly solidified on standing in the refrigerator. Traces of an impurity could be removed by chromatography on silica using CH2Cl2 as eluent. An analytical specimen was obtained as white crystals; mp 62.5-63 ºC (from pentane; 40 cm3/g at -20 ºC).

***N*1-(2-Naphthalenesulfonyl)-*N*2-(pyrazinoyl)-1,2-diaminoethane (8).** *N*-(2-Naphthalenesulfonyl)-1,2-diaminoethane27 **(7)** (1.25 g, 5.00 mmol) was dissolved in dry DMF (20 cm3) under argon. Recrystallized **3** (1.22 g, 5.00 mmol) was then introduced in small portions with rapid stirring followed by triethylamine (0.765 cm3, 5.50 mmol) at RT under argon. The yellow solution was stirred overnight with exclusion of atmospheric moisture. The resulting mixture was quenched in ice-water (300 cm3) and after stirring for 1h, the solid precipitate was allowed to settle in the cold. The fine-grained material was collected by filtration, rinsed with plenty of cold water and sucked dry. The powder was then suspended in Et2O (20 cm3) and after thorough trituration, the insoluble product was filtered off and washed with cold Et2O (35 cm3) and allowed to dry in air (1.772 g 99%); pure by TLC (toluene/MeCN 2:1); white crystalline solid **(8)** with mp 180-181 C (from CHCl3, 70 cm3/g, decolourizing carbon); H (400 MHz, (CD3)2SO): 3.05 (t, *J* 6.5, 2H), 3.40 (pert. dt, *J*6.5, 2H), 7.65 and 7.69 (2pert. dt, *J* 7, 1H+1H), 7.82 (dd, *J*1 8.7, *J*2 1.8, 1H), 7.89 (br. s, 1H), 7.98 (pert. dd, *J*18, *J*21.5, 1H), 8.05 (d, *J* 8.7, 1H), 8.13 (pert. dd, *J*18, *J*21.5, 1H), 8.44 (d, *J* 1.7, 1H), 8.66 (dd, *J*1 2.5, *J*2 1.5, 1H), 8.83 (d, *J* 2.4, 1H), 8.85 (br. t, *J*6, 1H), 9.08 (d, *J* 1.5, 1H). C (100.4 MHz, (CD3)2SO): 38.62, 41.86, 122.18, 127.28, 127.46, 127.72, 128.57, 129.07, 129.24, 131.62, 133.99, 137.34, 143.10, 143.29, 144.32, 147.42, 162.87. (Found: C, 57.0; H, 4.5; N, 15.3. C17H16N4O3S (356.41) requires: C, 57.29; H, 4.53: N, 15.72).

***N*1,*N*2-Di-Boc-*N*1-(2-naphthalenesulfonyl)-*N*2-(pyrazinoyl)-1,2-diaminoethane (9).** To a suspension of **8** (356 mg, 1.00 mmol) in dry CH2Cl2 (5 cm3) was added Boc2O (655 mg, 3.00 mmol) and DMAP (13 mg, 0.1 mmol) with thorough mixing. After a few min. all had dissolved and the almost colourless solution was left at RT overnight with exclusion of atmospheric moisture. The reaction was carefully monitored by TLC (toluene/MeCN 2:1) and after 18h, the reaction had not been completed. More Boc2O (437 mg, 2.00 mmol) was introduced but after a further 18 h, an intermediary product could still be detected. The solvent was stripped off at reduced pressure and the residual oil was redissolved in dry CH2Cl2 (2 cm3) and treated with more Boc2O (437 mg, 2.00 mmol) and DMAP (13 mg, 0.1 mmol). The resulting mixture was heated gently until all had dissolved completely whereafter it was left in a stoppered flask overnight. TLC now indicated essentially complete reaction and all solvent was evaporated. The remaining brownish oil was partitioned between Et2O (40 cm3) and 0.2 mol dm-3 citric acid (20 cm3) and the organic phase was washed in turn with 0.2 mol dm-3 citric acid, 1 mol dm-3 NaHCO3 and brine (310 cm3 each) and dried (MgSO4) in the presence of decolourizing carbon. Removal of the solvent left a white somewhat sticky solid, essentially pure by TLC. The yield of crude title compound was 552 mg (99%). Recrystallisation from Et2O/hexane 1:9 (100 cm3/g, decolourizing carbon) gave after seeding a white fluffy solid **9** with mp 106-107 C (softens at 103 C); H (400 MHz, CDCl3): 1.27 (s, 9H), 1.35 (s, 9H), 4.25 and 4.27 (2overlapping pert. t, 2H+2H), 7.62 and 7.67 (2pert. dt, *J*17, *J*21.56, 1H+1H), 7.86 (dd, *J*1 8.7, *J*2 1.9, 1H), 7.92 (pert. d, *J*8, 1H), 7.95 (d, *J* 8.7, 1H), 7.97 (pert. d, *J*8, 1H), 8.53 (dd, *J*1 2.5, *J*2 1.5, 1H), 8.54 (d, *J* 1.7, 1H), 8.64 (d, *J* 2.5, 1H), 8.92 (d, *J* 1.5, 1H). C (100.4 MHz, CDCl3): 27.46, 27.89, 44.07, 45.26, 84.23, 84.64, 122.57, 127.62, 127.93, 128.94, 129.11, 129.31, 129.96, 131.79, 135.05. 136.91, 142.64, 143.78, 145.00, 150.73, 151.04, 152.02. (Found: C, 58.5; H, 5.9; N, 9.9. C27H32N4O7S (556.64) requires: C, 58.26; H, 5.79; N, 10.07).

**Reduction of 2a by NaBH4 with simultaneous isolation of 1-naphthalenemethanol and Boc-NHBn.** Compound **2a** (361 mg, 1.00 mmol) was suspended in abs. EtOH (8 cm3) and treated with NaBH4 (189 mg, 5.00 mmol) in one batch under stirring, giving a clear solution within 15 min. The reaction was monitored by TLC, which indicated some remaining **2a** after 24 h, and therefore a second batch of NaBH4 (189 mg, 5.00 mmol) was added, whereupon remaining starting material disappeared. After another 24 h, the solvent was evaporated and the white solid distributed between Et2O (40 cm3) and water (20 cm3) and the extract dried (Na2SO4). Evaporation furnished 352 mg of a colourless oil, which was applied to a silica column (3x40 cm), packed in light petroleum/Et2O (3:1). Slow elution afforded a pure fraction (188 mg, 91%) with mp 56.5-57 C (from n-hexane) and 1H and 13C spectra identical to those of authentic material. Continued elution with light petroleum/Et2O (1:1) provided a second pure fraction (140 mg, 90%), consisting of 1-naphthylmethanol with mp 61.5-62 C (from pentane/Et2O 6:1; lit.,28 60.5-61.5 C) and with 1H and 13C spectra in good agreement with those for this compound.29

**Selective deprotection of 9 with NaBH4.** A solution of **9** (101 mg, 0.18 mmol) in THF/EtOH 1:1 (1 cm3) was treated with NaBH4 (14 mg, 0.36 mmol) with thorough mixing. The reaction mixture was briefly sonicated to dissolve all and after 15 min. TLC (toluene/MeCN 2:1) showed that all starting material had been consumed. The solution was taken to complete dryness at reduced pressure. The semisolid residue was partitioned between Et2O (50 cm3) and 1 mol dm-3 KHSO4 (20 cm3). The ethereal extract was washed successively with 1 mol dm-3 KHSO4, 1 mol dm-3 NaHCO3 and brine (310 cm3 each) and dried (MgSO4). Removal of the solvent left a white solid, chromatographically pure product consisting of *N*1, *N*2-di-Boc-*N*1-(2-naphthalenesulfonyl)-1,2-diaminoethane. The yield of crude **10** was 81 mg (99%). The analytical sample was recrystallized from Et2O (25 cm3/g, decolourizing carbon); tiny lustrous needles; mp 136-137 C; H (400 MHz, CDCl3): 1.29 (s, 9H), 1.45 (s, 9H), 3.51 (pert. dt, *J*5.5, 2H), 4.05 ( t, *J* 5.7, 2H), 4.98 (br. signal, 1H), 7.62 and 7.67 (2pert. dt, *J*17.2, *J*2 1.5, 1H+1H), 7.83 (dd, *J*1 8.7, *J*2 1.8, 1H), 7.92 (pert. d, *J*8, 1H), 7.95 (d, *J* 8.9, 1H), 7.98 (pert. d, *J*8, 1H), 8.52 (d, *J* 1.6, 1H). C (100.4 MHz, CDCl3): 27.80, 28.45, 40.69, 46.20, 79.35, 84.74, 122.45, 127.65, 127.92, 129.02, 129.16, 129.31, 129.01, 131.75, 135.02, 136.82, 151.04, 155.88. (Found: C, 59.0; H, 6.8; N, 6.2. C22H30N2O6S (450.56) requires: C, 58.65; H, 6.71; N, 6.22).

**References**

1. J. Blum, A. Fisher and E. Greener, *Tetrahedron,* 1973, **29**, 1073.
2. S. Kushner, R.I. Cassell, J. Morton II and J.H. Williams, *J. Org. Chem.*, 1951, **16**, 1283.
3. J.H. Billman and J.L. Rendall, *J. Am. Chem. Soc.*, 1944, **66**, 540.
4. T. Benincori, E. Brenna and F. Sannicolo, *J. Chem. Soc., Perkin Trans. 1*, 1993, 675.
5. S.S. Sabri, M.M. El-Abadelah and B.A. Al-Bitar, *Heterocycles*, 1987, **26**, 699.
6. T. Sakurai, H. Yamamoto, S. Yamada and H. Inoue, *Bull. Chem. Soc. Jpn.,* 1985, **58**, 1174.
7. B. Stanovnik, M. Tišler, V. Golob, I. Hvala and O. Nikolič, *J. Heterocyclic Chem.,* 1980, **17**, 733.
8. M. Kočevar, S. Polanc, B. Verček and M. Tišler, *Recl. Trav. Chim. Pays-Bas,* 1988, **107**, 366.
9. I. Koppel, J. Koppel, I. Koppel, I. Leito, V. Pihl, A. Wallin, L. Grehn and U. Ragnarsson, *J. Chem. Soc., Perkin Trans. 2*, 1993, 655.
10. E. Sartori, F. Camy, J.M. Teulon, F. Caussade, A. Virone-Oddos and A. Cloarec, *Eur. J. Med. Chem.*,1993, **28*,*** 625.
11. G.S. Hammond and P.A. Leermakers, *J. Am. Chem. Soc.,* 1962, **84**, 207.
12. (a) A. Fischli, *Helv. Chim. Acta,* 1979, **62**, 882; (b) W. Kitching, M. Bullpitt, D. Gartshore, W. Adcock, T.C. Khor, D. Doddrell and I.D. Rae, *J. Org. Chem.,* 1977, **42**, 2411.
